## ARTICLE

## BRCA2 Polymorphic Stop Codon K3326X and the Risk of Breast, Prostate, and Ovarian Cancers

Huong D. Meeks, Honglin Song, Kyriaki Michailidou, Manjeet K. Bolla, Joe Dennis, Qin Wang, Daniel Barrowdale, Debra Frost, EMBRACE, Lesley McGuffog, Steve Ellis, Bingjian Feng, Sandra S. Buys, John L. Hopper, Melissa C. Southey, Andrea Tesoriero, kConFab Investigators, Paul A. James, Fiona Bruinsma, Ian G. Campbell, Australia Ovarian Cancer Study Group, Annegien Broeks, Marjanka K. Schmidt, Frans B. L. Hogervorst, HEBON, Matthias W. Beckman, Peter A. Fasching, Olivia Fletcher, Nichola Johnson, Elinor J. Sawyer, Elio Riboli, Susana Banerjee, Usha Menon, Ian Tomlinson, Barbara Burwinkel, Ute Hamann, Frederik Marme, Anja Rudolph, Ramunas Janavicius, Laima Tihomirova, Nadine Tung, Judy Garber, Daniel Cramer, Kathryn L. Terry, Elizabeth M. Poole, Shelley S. Tworoger, Cecilia M. Dorfling, Elizabeth J. van Rensburg, Andrew K. Godwin, Pascal Guénel, Thérèse Truong, GEMO Study Collaborators, Dominique Stoppa-Lyonnet, Francesca Damiola, Sylvie Mazoyer, Olga M. Sinilnikova, Claudine Isaacs, Christine Maugard, Stig E. Bojesen, Henrik Flyger, Anne-Marie Gerdes, Thomas V. O. Hansen, Allen Jensen, Susanne K. Kjaer, Claus Hogdall, Estrid Hogdall, Inge Sokilde Pedersen, Mads Thomassen, Javier Benitez, Anna González-Neira, Ana Osorio, Miguel de la Hoya, Pedro Perez Segura, Orland Diez, Conxi Lazaro, Joan Brunet, Hoda Anton-Culver, Lee Eunjung, Esther M. John, Susan L. Neuhausen, Yuan Chun Ding, Danielle Castillo, Jeffrey N. Weitzel, Patricia A. Ganz, Robert L. Nussbaum, Salina B. Chan, Beth Y. Karlan, Jenny Lester, Anna Wu, Simon Gayther, Susan J. Ramus, Weiva Sieh, Alice S. Whittermore, Alvaro N. A. Monteiro, Catherine M. Phelan, Mary Beth Terry, Marion Piedmonte, Kenneth Offit, Mark Robson,

Received: March 30, 2015; Revised: August 13, 2015; Accepted: October 2, 2015

© The Author 2015. Published by Oxford University Press. All rights reserved. For Permissions, please e-mail: journals.permissions@oup.com.

Douglas Levine, Kirsten B. Moysich, Rikki Cannioto, Sara H. Olson, Mary B. Daly, Katherine L. Nathanson, Susan M. Domchek, Karen H. Lu, Dong Liang, Michelle A. T. Hildebrant, Roberta Ness, Francesmary Modugno, Leigh Pearce, Marc T. Goodman, Pamela J. Thompson, Hermann Brenner, Katja Butterbach, Alfons Meindl, Eric Hahnen, Barbara Wappenschmidt, Hiltrud Brauch, Thomas Brüning, Carl Blomqvist, Sofia Khan, Heli Nevanlinna, Liisa M. Pelttari, Kristiina Aittomäki, Ralf Butzow, Natalia V. Bogdanova, Thilo Dörk, Annika Lindblom, Sara Margolin, Johanna Rantala, Veli-Matti Kosma, Arto Mannermaa, Diether Lambrechts, Patrick Neven, Kathleen B. M. Claes, Tom Van Maerken, Jenny Chang-Claude, Dieter Flesch-Janys, Florian Heitz, Raymonda Varon-Mateeva, Paolo Peterlongo, Paolo Radice, Alessandra Viel, Monica Barile, Bernard Peissel, Siranoush Manoukian, Marco Montagna, Cristina Oliani, Ana Peixoto, Manuel R. Teixeira, Anita Collavoli, Emily Hallberg, Janet E. Olson, Ellen L. Goode, Steven N. Hart, Hermela Shimelis, Julie M. Cunningham, Graham G. Giles, Roger L. Milne, Sue Healey, Kathy Tucker, Christopher A. Haiman, Brian E. Henderson, Mark S. Goldberg, Marc Tischkowitz, Jacques Simard, Penny Soucy, Diana M. Eccles, Nhu Le, Anne-Lise Borresen-Dale, Vessela Kristensen, Helga B. Salvesen, Line Bjorge, Elisa V. Bandera, Harvey Risch, Wei Zheng, Alicia Beeghly-Fadiel, Hui Cai, Katri Pylkäs, Robert A. E. M. Tollenaar, Ans M. W. van der Ouweland, Irene L. Andrulis, Julia A. Knight, OCGN, Steven Narod, Peter Devilee, Robert Winqvist, Jonine Figueroa, Mark H. Greene, Phuong L. Mai, Jennifer T. Loud, Montserrat García-Closas, Minouk J. Schoemaker, Kamila Czene, Hatef Darabi, Iain McNeish, Nadeem Siddiquil, Rosalind Glasspool, Ava Kwong, Sue K. Park, Soo Hwang Teo, Sook-Yee Yoon, Keitaro Matsuo, Satoyo Hosono, Yin Ling Woo, Yu-Tang Gao, Lenka Foretova, Christian F. Singer, Christine Rappaport-Feurhauser, Eitan Friedman, Yael Laitman, Gad Rennert, Evgeny N. Imyanitov, Peter J. Hulick, Olufunmilayo I. Olopade, Leigha Senter, Edith Olah, Jennifer A. Doherty, Joellen Schildkraut, Linetta B. Koppert, Lambertus A. Kiemeny, Leon F. A. G. Massuger, Linda S. Cook, Tanja Pejovic, Jingmei Li, Ake Borg, Anna Öfverholm, Mary Anne Rossing, Nicolas Wentzensen, Karin Henriksson, Angela Cox, Simon S. Cross, Barbara J. Pasini, Mitul Shah, Maria Kabisch, Diana Torres, Anna Jakubowska, Jan Lubinski, Jacek Gronwald, Bjarni A. Agnarsson, Jolanta Kupryjanczyk,

# Joanna Moes-Sosnowska, Florentia Fostira, Irene Konstantopoulou, Susan Slager, Michael Jones, Prostate cancer Association group To Investigate Cancer Associated Alterations in the genome\*, Antonis C. Antoniou, Andrew Berchuck, Anthony Swerdlow, Georgia Chenevix-Trench, Alison M. Dunning, Paul D. P. Pharoah, Per Hall, Douglas F. Easton, Fergus J. Couch, Amanda B. Spurdle, David E. Goldgar

**Affiliations of authors:** Cancer Control and Population Sciences, Huntsman Cancer Institute, University of Utah, Salt Lake City, UT (HDM, DEG); Centre for Cancer Genetic Epidemiology, Department of Oncology, University of Cambridge, Cambridge, UK (Hso, BJP, MS, AMD, PDPP, DFE); Centre for Cancer Genetic Epidemiology, Department of Public Health and Primary Care, University of Cambridge, Cambridge, UK (KM, MKB, JD, QW, DB, DF, EMBRACE, LM, SE, ACA, PHPP, DFE); Department of Dermatology, Huntsman Cancer Institute, University of Utah School of Medicine, Salt Lake City, UT (BF, DEG); Department of Medicine, Huntsman Cancer Institute, University of Utah School of Medicine, Salt Lake City, UT (SSB); Centre for Epidemiology and Biostatistics, Melbourne School of Population and Global Health, the University of Melbourne, Melbourne, Victoria, Australia (LH, GGG, RLM); Department of Pathology, the University of Melbourne, Melbourne, Victoria, Australia (MCS); Genetic Epidemiology Laboratory, Department of Pathology, University of Melbourne, Parkville, Victoria, Australia (AT); kConFab: Kathleen Cuninghame Consortium for Research into Familial Breast Cancer – Peter MacCallum Cancer Center, Melbourne, Victoria, Australia (kConFab); Familial Cancer Centre, Peter MacCallum Cancer Center, Melbourne, Victoria, Australia (PAJ); Department of Oncology, the University of Melbourne, Melbourne, Victoria, Australia (PA); Cancer Epidemiology Centre, Cancer Council Victoria, Melbourne, Victoria, Australia (FB, GGG, RLM); Sir Peter MacCallum Department of Oncology, Peter MacCallum Cancer Centre, University of Melbourne, Parkville, Victoria, Australia (IGC); Cancer Division, QIMR Berghofer Medical Research Institute, Brisbane, Queensland, Australia (AOCSG, SHE, GCT); Peter MacCallum Cancer Institute, East Melbourne, Victoria, Australia (AOCSG); Netherlands Cancer Institute, Antoni van Leeuwenhoek Hospital, Amsterdam, the Netherlands (ABR, MKS); Family Cancer Clinic, Netherlands Cancer Institute, Amsterdam, the Netherlands (FBLH); The Hereditary Breast and Ovarian Cancer Research Group Netherlands (HEBON) Coordinating Center, Netherlands Cancer Institute, Amsterdam, the Netherlands (HEBON); Department of Gynaecology and Obstetrics, University Hospital Erlangen, Friedrich-Alexander University Erlangen-Nuremberg, Comprehensive Cancer Center Erlangen-EMN, Erlangen, Germany (MWB, PAF); Division of Hematology and Oncology, Department of Medicine, David Geffen School of Medicine, University of California, Los Angeles, Los Angeles, CA (PAF); Division of Breast Cancer Research and Breakthrough Breast Cancer Research Centre, Institute of Cancer Research, London, UK (OF, NJ, AS); Research Oncology, Division of Cancer Studies, King's College London, Guy's Hospital, London, UK (EJS); Department of Epidemiology and Biostatistics, School of Public Health, Imperial College, London, UK (ER); The Royal Marsden NHS Foundation Trust, London, UK (SB); Women's Cancer, University College London Elizabeth Garrett Anderson (EGA) Institute for Women's Health, London, UK (UM); Wellcome Trust Centre for Human Genetics and Oxford Biomedical Research Centre, University of Oxford, Oxford, UK (IT); Division of Molecular Genetic Epidemiology, German Cancer Research Center, Heidelberg, Germany (BB); Molecular Genetics of Breast Cancer, German Cancer Research Center, Heidelberg, Germany (UH, MK, DT); Department of Obstetrics and Gynecology, University of Heidelberg, Heidelberg, Germany (FMa); National Center for Tumor Diseases, University of Heidelberg, Heidelberg, Germany (FMa); Division of Cancer Epidemiology, German Cancer Research Center, Heidelberg, Germany (AR, JCC); State Research Institute Centre for Innovative Medicine, Vilnius, Lithuania (RJ); Latvian Biomedical Research and Study Centre, Riga, Latvia (LT); Department of Medical Oncology, Beth Israel Deaconess Medical Center, Boston, MA (NT); Cancer Risk and Prevention Clinic, Dana-Farber Cancer Institute, Boston, MA (JGa); Obstetrics and Gynecology Epidemiology Center, Brigham and Women's Hospital, Boston, MA (DCr, KLT); Channing Division of Network Medicine, Brigham and Women's Hospital and Harvard Medical School, Boston, MA (EMP, SST, ABS); Department of Epidemiology, Harvard School of Public Health, Boston, MA (EMP, SST); Department of Genetics, University of Pretoria, Pretoria, South Africa (CMD, EJVR); Department of Pathology and Laboratory Medicine, University of Kansas Medical Center, Kansas City, KS (AKG); National Institute of Health and Medical Research (INSERM) U1018, Center for Research in Epidemiology and Population Health (CESP), Environmental Epidemiology of Cancer, Villejuif, France (PG, TT); University Paris-Sud, Villejuif, France (PG, TT); GEMO study: National Cancer Genetics Network, UNICANCER Genetic Group, France (GEMO); Institut Curie, Department of Tumour Biology, Paris, France (DSL); Institut Curie, INSERM U830, Paris, France (DSL); Université Paris Descartes, Sorbonne Paris Cité, Paris, France (DSL); INSERM U1052, CNRS UMR 5286, Université Lyon, Centre de Recherche en Cancérologie de Lyon, Lyon, France (FD, SMaz, OMS); Unité Mixte de Génétique Constitutionnelle des Cancers Fréquents, Hospices Civils de Lyon – Centre Léon Bérard, Lyon, France (OMS); Lombardi Comprehensive Cancer Center, Georgetown University, Washington, DC (CI); Laboratoire de diagnostic génétique et Service d'Onco-hématologie, Hôpitaux Universitaires de Strasbourg, CHRU Nouvel Hôpital Civil, Strasbourg, France (CM); Faculty of Health and Medical Sciences, University of Copenhagen, Copenhagen, Denmark (SEB); Department of Clinical Biochemistry, Herlev Hospital, Copenhagen University Hospital, Herlev, Denmark (SEB); Department of Breast Surgery, Herlev Hospital, Copenhagen University Hospital, Herlev, Denmark (HF); Department of Clinical Genetics, Rigshospitalet, Copenhagen University Hospital, Copenhagen, Denmark (AMG); Center for Genomic Medicine, Rigshospitalet, Copenhagen University Hospital, Copenhagen, Denmark (TVOH); Department of Virus, Lifestyle and Genes, Danish Cancer Society Research Center, Copenhagen, Denmark (Aje, SKK, EHO); Department of Gynecology, Rigshospitalet, University of Copenhagen, Copenhagen, Denmark (SKK, CH); Molecular Unit, Department of Pathology, Herlev Hospital, University of Copenhagen, Copenhagen, Denmark (EHO); Section of Molecular Diagnostics, Department of Biochemistry, Aalborg University Hospital, Aalborg, Denmark (ISP); Department of Clinical Genetics, Odense University Hospital, Odense C, Denmark (MTH); Human Genetics Group, Human Cancer Genetics Program, Spanish National Cancer Centre (CNIO), Madrid, Spain (JBe, AO); Human Genotyping Unit (CEGEN), Human Cancer Genetics Program, Spanish National Cancer Centre (CNIO), Madrid, Spain (JBe, AGN); Biomedical Network on Rare Diseases (CIBERER), Madrid, Spain (JBe, AO); Molecular Oncology Laboratory, Hospital Clinico San Carlos, IdiSSC (Instituto de Investigacion Sanitaria del Hospital Clinico San Carlos), Madrid, Spain (MdlH); Department of Oncology, Hospital Clinico San Carlos, IdiSSC, Madrid, Spain (PPS); Oncogenetics Group, University Hospital Vall d'Hebron, Vall d'Hebron Institute of Oncology (VHIO) and Universitat Autònoma de Barcelona, Barcelona, Spain (OD); Molecular Diagnostic Unit, Hereditary Cancer Program, IDIBELL (Bellvitge Biomedical Research Institute)- Catalan Institute of Oncology, Barcelona, Spain (CL); Genetic Counseling Unit, Hereditary Cancer Program, IDIBGI (Institut d'Investigació Biomèdica de Girona)- Catalan Institute of Oncology, Girona, Spain (JBr); Department of Epidemiology, School of Medicine, University of California, Irvine, CA (HAC); Department of Preventive Medicine, Keck School of Medicine, University of Southern California Norris Comprehensive Cancer Center, Los Angeles, CA (LE, AW, SG, SJR, LP, CAH, BEH); Department of Epidemiology, Cancer Prevention Institute of California, Fremont, California (EMJ); Department of Population Sciences, Beckman Research Institute of City of Hope, Duarte, CA (SLN, YCD); Clinical Cancer Genetics, for the City of Hope Clinical Cancer Genetics Community Research Network, Duarte, CA (DCA, JNW); UCLA Schools of Medicine and Public Health, Division of Cancer Prevention and Control Research, Jonsson Comprehensive Cancer Center, Los Angeles, CA (PAG); Department of Medicine and Genetics, University of California, San Francisco, CA (RLN); Cancer Risk Program, Helen Diller Family Cancer Center, University of California, San Francisco, CA (SBC); Women's Cancer Program at the Samuel Oschin Comprehensive Cancer Institute, Cedars-Sinai Medical Center, Los Angeles, CA (BYK, JLe); Department of Health Research and Policy-Epidemiology, Stanford University of Medicine, Stanford, CA (WS, ASW); Department of Cancer Epidemiology, Moffitt Cancer Center, Tampa, FL (ANAM, CMP); Department of Epidemiology, Mailman School of Public Health, Columbia University, New York, NY (MBT); NRG Oncology Statistics and Data Management Center, Roswell Park Center Institute, Buffalo, NY (MP); Department of Medicine, Memorial Sloan-Kettering Cancer Center, New York, NY (KO, MR); Gynecology Service, Department of Surgery, Memorial Sloan Kettering Cancer Center, New York, NY (DLe); Department of Cancer Prevention and Control, Roswell Park Center Institute, Buffalo, NY (KBM, RC); Department of Epidemiology and Biostatistics, Memorial Sloan Kettering Cancer Center, New York, NY (SHO); Department of Clinical Genetics, Fox Chase Cancer Center, Philadelphia, PA (MBD); Basser Center, Abramson Cancer Center, Perelman School of Medicine, University of Pennsylvania, PA (KLN, SMD); Department of Gynecologic Oncology, University of Texas MD Anderson Cancer Center, Houston, TX (KHL); College of Pharmacy and Health Sciences, Texas Southern University, Houston, TX (DLi); Department of Epidemiology, University of Texas MD Anderson Cancer Center, Houston, TX (MATH); University of Texas School of Public Health, Houston, TX (RN); Department of Obstetrics, Gynecology and Reproductive Sciences, University of Pittsburgh School of Medicine, Pittsburgh, PA (FMO); Department of Epidemiology, University of Pittsburgh Graduate School of Public Health, Pittsburgh, PA (FMO); Womens Cancer Research Program, Magee-Womens Research Institute and University of Pittsburgh Cancer Institute, Pittsburgh, PA (FMO); Department of Epidemiology, University of Michigan School of Public Health, Ann Arbor, MI (LP); Cancer Prevention and Control, Samuel Oschin Comprehensive Cancer Institute, Cedars-Sinai Medical Center, Los Angeles, CA (MTG, PJT); Community and Population Health Research Institute, Department of Biomedical Sciences, Cedars-Sinai Medical Center, Los Angeles, CA (MTG, PJT); Division of



Clinical Epidemiology and Aging Research, German Cancer Research Center, Heidelberg, Germany (HBre); German Cancer Consortium (DKTK), German Cancer Research Center, Heidelberg, Germany (HBre, HBra); Division of Health Sciences, Warwick Medical School, Warwick University, Coventry, UK (KB); Department of Gynaecology and Obstetrics, Division of Tumor Genetics, Klinikum Rechts der Isar, Technical University of Munich, Munich, Germany (AMe); Center for Integrated Oncology, University Hospital of Cologne, Cologne, Germany (EHah, BW); Center for Molecular Medicine, University Hospital of Cologne, Cologne, Germany (EHah, BW); Center for Familial Breast and Ovarian Cancer, University Hospital of Cologne, Cologne, Germany (EHah, BW); Department of Gynaecology and Obstetrics, University Hospital of Cologne, Cologne, Germany (BW); Dr. Margarete Fischer-Bosch-Institute of Clinical Pharmacology, Stuttgart, Germany (HBra); University of Tübingen, Tübingen, Germany (HBra); Institute for Prevention and Occupational Medicine of the German Social Accident Insurance and Institute of the Ruhr University Bochum (IPA), Bochum, Germany (TB); Department of Oncology, University of Helsinki and Helsinki University Hospital, Helsinki, Finland (CB); Department of Obstetrics and Gynecology, University of Helsinki and Helsinki University Hospital, Helsinki, Finland (SK, HN, LMP); Department of Clinical Genetics, University of Helsinki and Helsinki University Hospital, Helsinki, Finland (KA); Department of Pathology, University of Helsinki and Helsinki University Hospital, Helsinki, Finland (RB); Gynaecology Research Unit, Hannover Medical School, Hannover, Germany (NVB, TD); Department of Molecular Medicine and Surgery, Karolinska Institutet, Stockholm, Sweden (AL); Department of Oncology-Pathology, Karolinska Institutet, Stockholm, Sweden (Smar); Department of Clinical Genetics, Karolinska University Hospital, Stockholm, Sweden (JR); School of Medicine, Institute of Clinical Medicine, Pathology and Forensic Medicine, University of Eastern Finland, Kuopio, Finland (VMK, AMa); Imaging Center, Department of Clinical Pathology, Kuopio University Hospital, Kuopio, Finland (VMK, AMa); Cancer Center, Kuopio University Hospital, Kuopio, Finland (VMK, AMa); Vesalius Research Center (VRC), VIB, Leuven, Belgium (DLa); Laboratory for Translational Genetics, Department of Oncology, University of Leuven, Leuven, Belgium (DLa); Multidisciplinary Breast Center, Department of Oncology, University Hospitals Leuven, Leuven, Belgium (PN); Center for Medical Genetics, Ghent University, Ghent, Belgium (KBMC, TVM); Institute of Medical Biometrics and Epidemiology, University Medical Center Hamburg-Eppendorf, Hamburg, Germany (DFJ); Department of Cancer Epidemiology, Clinical Cancer Registry, University Medical Center Hamburg-Eppendorf, Hamburg, Germany (DFJ); Department of Gynecology and Gynecologic Oncology, Kliniken Essen-Mitte/Evang. Huysens-Stiftung/Knappschaft GmbH, Essen, Germany (FH); Department of Gynecology and Gynecologic Oncology, Dr. Horst Schmidt Kliniken Wiesbaden, Wiesbaden, Germany (FH); Institute of Human Genetics, Campus Virchow Klinikum, Charité Berlin, Germany (RVM); IFOM, Fondazione Istituto FIRC di Oncologia Molecolare, Milan, Italy (PP); Unit of Molecular Bases of Genetic Risk and Genetic Testing, Department of Preventive and Predictive Medicine, Fondazione IRCCS Istituto Nazionale dei Tumori, Milan, Italy (PR); Division of Experimental Oncology, CRO (Centro di Riferimento Oncologico) Aviano National Cancer Institute, Aviano, Italy (AV); Division of Cancer Prevention and Genetics, Istituto Europeo di Oncologia, Milan, Italy (MB); Unit of Medical Genetics, Department of Preventive and Predictive Medicine, Fondazione IRCCS Istituto Nazionale Tumori, Milan, Italy (BP, SMan); Immunology and Molecular Oncology Unit, Veneto Institute of Oncology IOV-IRCCS, Padua, Italy (MM); U.O.C. di Oncologia, ULSS5 Ovest Vicentino, Italy (CO); Department of Genetics, Portuguese Oncology Institute, Porto, Portugal (AP, MRT); Biomedical Sciences Institute (ICBAS), University of Porto, Porto, Portugal (MRT); Section of Genetic Oncology, Department of Laboratory Medicine, University and University Hospital of Pisa, Pisa, Italy (ACol); Department of Health Sciences Research, Mayo Clinic, Rochester, MN (EHal, JEO, ELG, SNH, SS, FJC); Department of Laboratory Medicine and Pathology, Mayo Clinic, Rochester, MN (HSH, JMC, FJC); Prince of Wales Hospital, Randwick, Sydney, Australia (KT); Division of Clinical Epidemiology, Royal Victoria Hospital, McGill University, Montreal, Canada (MSG); Department of Medicine, McGill University, Montreal, Canada (MSG); Program in Cancer Genetics, Departments of Human Genetics and Oncology, McGill University, Montreal, Quebec, Canada; currently at Medical School Cambridge University, Cambridge, England (MTI); Centre Hospitalier Universitaire de Québec Research Center and Laval University, Québec, Canada (Jsi, PS); Faculty of Medicine, University of Southampton, Southampton, UK (DME); Cancer Control Research, BC Cancer Agency, Vancouver, Canada (NL); Department of Genetics, Institute for Cancer Research, Oslo University Hospital, Radiumhospitalet, Oslo, Norway (ALBD, VK); Institute of Clinical Medicine, Faculty of Medicine, University of Oslo, Oslo, Norway (ALBD, VK); Department of Clinical Molecular Biology, Oslo University Hospital, University of Oslo, Oslo, Norway (VK); Department of Gynecology and Obstetrics, Haukeland University Hospital, Bergen, Norway (HBS, LB); Centre for Cancer Biomarkers, Department of Clinical Science, University of Bergen, Bergen, Norway (HBS, LB); Rutgers Cancer Institute of New Jersey, New Brunswick, NJ (EVB); Department of Chronic Disease Epidemiology, Yale School of Public Health, New Haven, CT (HR); Division of Epidemiology, Department of Medicine, Vanderbilt Epidemiology Center, Vanderbilt-Ingram Cancer Center, Vanderbilt University School of Medicine, Nashville, TN (WZ, ABF, HC); Laboratory of Cancer Genetics and Tumor Biology, Department of Clinical Chemistry and Biocenter Oulu, University of Oulu, Oulu, Finland (KP, RW); Laboratory of Cancer Genetics and Tumor Biology, Northern Finland Laboratory Centre Nordlab, Oulu, Finland (KP, RW); Department of Surgical Oncology, Erasmus University Medical Center, Rotterdam, the Netherlands (RAEMT, LBK); Department of Clinical Genetics, Family Cancer Clinic, Erasmus University Medical Center, Rotterdam, the Netherlands (AMWvdO); Ontario Cancer Genetics Network Fred A. Litwin Center for Cancer Genetics, Lunenfeld Research Institute, Mount Sinai Hospital, Toronto, Ontario, Canada (ILA, OCGN); Department of Molecular Genetics, University of Toronto, Toronto, Ontario, Canada (LA); Prosserman Centre for Health Research, Lunenfeld-Tanenbaum Research Institute of Mount Sinai Hospital, Toronto, Canada (JAK); Division of Epidemiology, Dalla Lana School of Public Health, University of Toronto, Toronto, Canada (JAK); Women's College Research Institute, University of Toronto, Toronto, Ontario, Canada (SN); Department of Human Genetics, Leiden University Medical Center, Leiden, the Netherlands (PD); Department of Pathology, Leiden University Medical Center, Leiden, the Netherlands (PD); Division of Cancer Epidemiology and Genetics, National Cancer Institute, Rockville, MD (JF); Clinical Genetics Branch, Division of Cancer Epidemiology and Genetics, National Cancer Institute, National Institutes of Health, Rockville, MD (MHG, PLM, JTL); Division of Genetics and Epidemiology, Institute of Cancer Research, London, UK (MGC, MJS, MJ, AS); Department of Medical Epidemiology and Biostatistics, Karolinska Institutet, Stockholm, Sweden (KC, HD, JLi, PH); Institute of Cancer Sciences, University of Glasgow, Wolfson Wohl Cancer Research Centre, Beatson Institute for Cancer Research, Glasgow, UK (IM); Department of Gynaecological Oncology, Glasgow Royal Infirmary, Glasgow, UK (NS); Cancer Research UK Clinical Trials Unit, Glasgow, Beatson West of Scotland Cancer Centre, Glasgow, UK (RG); The Hong Kong Hereditary Breast Cancer Family Registry, Cancer Genetics Center, Hong Kong Sanatorium and Hospital, Hong Kong (AK); Department of Surgery, University of Hong Kong, Hong Kong (AK); Department of Preventive Medicine, Seoul National University College of Medicine, Seoul, Republic of Korea (SKP); Department of Biomedical Science, Seoul National University College of Medicine, Seoul, Republic of Korea (SKP); Cancer Research Institute, Seoul National University College of Medicine, Seoul, Republic of Korea (SKP); Cancer Research Initiatives Foundation, Sime Darby Medical Centre, Subang Jaya, Selangor, Malaysia (SHT, SYY); University Malaya Cancer Research Institute, Faculty of Medicine, University Malaya Medical Centre, University Malaya, Kuala Lumpur, Malaysia (SYY); Division of Molecular Medicine, Aichi Cancer Center Research Institute, Nagoya, Aichi, Japan (KMa); Division of Epidemiology and Prevention, Aichi Cancer Center Research Institute, Nagoya, Aichi, Japan (SHo); Department of Obstetrics and Gynecology, University Malaya Medical Centre, University Malaya, Kuala Lumpur, Malaysia (YLW); Department of Epidemiology, Shanghai Cancer Institute, Shanghai, China (YTG); Masaryk Memorial Cancer Institute and Medical Faculty, Brno, Czech Republic (LF); Department of Obstetrics and Gynecology, and Comprehensive Cancer Center, Medical University of Vienna, Vienna, Austria (CFS, CRF); Susanne Levy Gertner Oncogenetics Unit, Sheba Medical Center, Tel-Hashomer, Israel (EF, YL); Clalit National Israeli Cancer Control Center and Department of Community Medicine and Epidemiology, Carmel Medical Center and B. Rappaport Faculty of Medicine, Haifa, Israel (GR); N. N. Petrov Institute of Oncology, St. Petersburg, Russia (ENI); Center for Medical Genetics, NorthShore University Health System, Evanston, IL (PJH); Center for Clinical Cancer Genetics and Global Health, University of Chicago Medical Center, Chicago, IL (OIO); Division of Human Genetics, Department of Internal Medicine, The Comprehensive Cancer Center, The Ohio State University, Columbus, OH (LS); Department of Molecular Genetics, National Institute of Oncology, Budapest, Hungary (EO); Department of Community and Family Medicine, Section of Biostatistics and Epidemiology, Geisel School of Medicine, Dartmouth College, Hanover, NH (JAD); Department of Community and Family Medicine, Duke University Medical Center, Durham, NC (JSc); Cancer Control and Population Sciences, Duke Cancer Institute, Durham, NC (JSc); Radboud University Medical Center, Radboud Institute for Health Sciences, Nijmegen, the Netherlands (LAK); Radboud University Medical Center, Radboud Institute for Molecular Life Sciences, Department of Gynaecology, Nijmegen, the Netherlands (LFAGM); Division of Epidemiology and Biostatistics, Department of Internal Medicine, University of New Mexico, Albuquerque, NM (LSC); Department of Obstetrics and Gynecology, Oregon Health and Science University, Portland, OR (TP); Knight Cancer Institute, Oregon Health and Science University, Portland, OR (TP); Department of Oncology, Lund University, Lund, Sweden (ABO); Department of Clinical Genetics, Sahlgrenska University Hospital, Gothenburg, Sweden (AÓ); Program in Epidemiology, Fred Hutchinson Cancer Research Center, Seattle, WA (MAR); Division of Cancer Epidemiology and Genetics, National Cancer Institute, Bethesda, MD (NW); Oncologic Centre, Regional Tumour Registry, Lund University Hospital, Lund, Sweden (KH); Sheffield Cancer Research Department of Oncology, University of Sheffield, Sheffield, UK (ACox); Academic Unit of Pathology, Department of Neuroscience, University of Sheffield, Sheffield, UK (SSC); Institute of Human Genetics, Pontificia Universidad Javeriana, Bogota, Colombia (DT); Department of Genetics and Pathology, Pomeranian Medical University, Szczecin, Poland (Aja, JLu, JGr); Landspítali University Hospital and University of Iceland School of Medicine, Reykjavik, Iceland (BAA); Department of Pathology and Laboratory Diagnostics, the Maria Skłodowska-Curie Memorial Cancer Center and Institute of Oncology, Warsaw, Poland (JK, JMS); Molecular Diagnostic Laboratory, Institute of Nuclear and Radiologic Sciences and Technology, Energy and Safety, National Centre for Scientific Research Demokritos, Athens, Greece (FF, IK); Department of Obstetrics and Gynecology, Duke University Medical Center, Durham, NC (ABe).

\* A full list of members is provided in the [Supplementary Note](#) (available online).

Correspondence to: David E. Goldgar, PhD, Huntsman Cancer Institute, Department of Dermatology, University of Utah School of Medicine, 2000 Circle of Hope Drive, Salt Lake City, UT 84112 (e-mail: [david.goldgar@hsc.utah.edu](mailto:david.goldgar@hsc.utah.edu)).

## Abstract

**Background:** The K3326X variant in BRCA2 (BRCA2\*c.9976A>T; p.Lys3326\*; rs11571833) has been found to be associated with small increased risks of breast cancer. However, it is not clear to what extent linkage disequilibrium with fully pathogenic mutations might account for this association. There is scant information about the effect of K3326X in other hormone-related cancers.

**Methods:** Using weighted logistic regression, we analyzed data from the large iCOGS study including 76 637 cancer case patients and 83 796 control patients to estimate odds ratios (OR<sub>w</sub>) and 95% confidence intervals (CIs) for K3326X variant carriers in relation to breast, ovarian, and prostate cancer risks, with weights defined as probability of not having a pathogenic BRCA2 variant. Using Cox proportional hazards modeling, we also examined the associations of K3326X with breast and ovarian cancer risks among 7183 BRCA1 variant carriers. All statistical tests were two-sided.

**Results:** The K3326X variant was associated with breast (OR<sub>w</sub> = 1.28, 95% CI = 1.17 to 1.40, P = 5.9x10<sup>-6</sup>) and invasive ovarian cancer (OR<sub>w</sub> = 1.26, 95% CI = 1.10 to 1.43, P = 3.8x10<sup>-3</sup>). These associations were stronger for serous ovarian cancer and for estrogen receptor–negative breast cancer (OR<sub>w</sub> = 1.46, 95% CI = 1.2 to 1.70, P = 3.4x10<sup>-5</sup> and OR<sub>w</sub> = 1.50, 95% CI = 1.28 to 1.76, P = 4.1x10<sup>-5</sup>, respectively). For BRCA1 mutation carriers, there was a statistically significant inverse association of the K3326X variant with risk of ovarian cancer (HR = 0.43, 95% CI = 0.22 to 0.84, P = .013) but no association with breast cancer. No association with prostate cancer was observed.

**Conclusions:** Our study provides evidence that the K3326X variant is associated with risk of developing breast and ovarian cancers independent of other pathogenic variants in BRCA2. Further studies are needed to determine the biological mechanism of action responsible for these associations.

Inheritance of a pathogenic variant in BRCA2 is one of the strongest risk factors for breast and ovarian cancers (1–4). Estimates of the cumulative risk by age 70 years in BRCA2 variant carriers are 45% for breast cancer and 11% for ovarian cancer (5,6). BRCA2 variants have also been shown to increase risk of prostate cancer (7–9), with the lifetime risk of prostate cancer in BRCA2 variant carriers estimated in the range of 19% to 34% (9). In some studies, carriers of BRCA2 pathogenic variants also had increased risks of several other cancers, including pancreatic cancer (7,8,10,11), stomach cancer, and malignant melanoma (7).

BRCA2\*c.9976A>T; p.Lys3326\*, hereafter referred to as K3326X, arises from a substitution of thymidine for adenine at nucleotide 9976 of the BRCA2 coding sequence and results in loss of the final 93 amino acids of the BRCA2 protein. This premature stop codon was first described in 1996 by Mazoyer et al. (12), who found a minor allele frequency of about 1% in the control population and no increased prevalence of this sequence variant in patients with breast cancer; however, the study was small, with 462 control patients and 513 case patients. Since then, the K3326X variant has been identified in individuals with various types of cancers, either alone or in combination with known pathogenic variants in BRCA2 (13–15). Genome-wide association studies have identified the association between the K3326X variant and risk of squamous-cell lung cancer (16) and breast cancer (17) at genome-wide statistical significance levels, with odds ratios (ORs) of 2.47 (95% CI = 2.03 to 3.00, P = 4.7x10<sup>-20</sup>) and 1.26 (95% CI = 1.14 to 1.39, P = 4.9x10<sup>-8</sup>), respectively. Recently, a large, pooled case-control study of cancers of the upper aero-digestive tract (UADT; including esophageal cancer) and the K3326X variant found that the K3326X variant was associated with UADT cancers (OR = 2.53, 95% CI = 1.89 to 3.38) (18) as well, with a particularly strong effect for esophageal cancer (OR = 3.30, P = 3x10<sup>-4</sup>). K3326X is in linkage disequilibrium (LD) with the pathogenic variants BRCA2\*c.6275\_6276delTT (formerly reported as 6503-6504delTT) and BRCA2\*c.9257-16T>C (formerly reported as IVS 24-17T>C) (12,14). In a study of 1850 high-risk breast and ovarian cancer UK families fully sequenced for BRCA2, Higgs et al. (19) asserted that the association with increased breast cancer risk previously reported by Michailidou et al. (17) was because of LD with BRCA2\*c.6275\_6276delTT and reported no associations

with pancreatic, lung, or esophageal cancer risks, although the confidence intervals were wide and could not exclude the point estimates from the large-scale case-control studies cited above (16,18).

In this study, we therefore analyzed the association of the BRCA2 K3326X sequence variant with respect to risk of breast cancer, adjusting for potential effects of LD with known BRCA2 pathogenic variants, and for the first time examined the association between K3326X and ovarian and prostate cancer. We further assessed whether K3326X is an independent modifier of breast and ovarian cancer risk in BRCA1 pathogenic variant carriers.

## Methods

This study used data from the four consortia within the Collaborative Oncological Gene-Environment Study (COGS): the Consortium of Investigators of Modifiers of BRCA1/2 (CIMBA), the Breast Cancer Association Consortium (BCAC), the Ovarian Cancer Association Consortium (OCAC), and the PRostate cancer AssoCiation group To Investigate Cancer Associated aLterations in the genome (PRACTICAL). The COGS central focus was using data from high-throughput genotyping of large epidemiological studies, with state-of-the-art analysis and mathematical models to combine data on genetic and environmental/life style risk factors (20). All studies had approval from the relevant ethics committees, and all participants gave informed consent. Details on the numbers of participants in each consortium are shown in Table 1.

To validate the effect of the BRCA2 K3326X variant on ovarian cancer risk, we sequenced the BRCA2 gene in an independent sample of ovarian cancer case patients and control patients.

## Statistical Analysis

Fisher's exact statistics were calculated to assess associations between the K3326X variant and known BRCA2 pathogenic variants among study patients in CIMBA. Using the datasets from the BCAC, OCAC, and PRACTICAL consortia, we evaluated the association of the BRCA2 K3326X variant with risks of breast,

invasive ovarian, and prostate cancer, respectively, through logistic regression models with adjustment for attained age, consortium study site, and principal components of population structure. To examine the hypothesis that K3326X is associated with breast and ovarian cancers independently from BRCA2 pathogenic variants, we calculated and compared odds ratios using weighted logistic regression models (ie,  $OR_w$ ), described below, and odds ratios using unweighted logistic regression models (ie, OR) using Wald Z-statistics. Because of the lack of BRCA2 status in the BCAC and OCAC datasets, to account for possible LD with BRCA2 pathogenic variants we developed a model using the CIMBA dataset to predict whether case patients and control patients were carriers of pathogenic BRCA2 variants based on age at diagnosis (for case patients) and age at interview (for control patients) and carrier status at K3326X. We then used this model to predict the probability of not having a pathogenic BRCA2 variant in the other datasets and used this as the weight in the logistic regression model. This weight allowed us to adjust for the contribution of each patient to the test statistics based on their probability of not having a pathogenic BRCA2

**Table 1.** Number of control patients and breast cancer, ovarian cancer, and prostate cancer case patients included in the analysis

| Study                                                                                                         | Included in the analysis                                                                                                                                                              |
|---------------------------------------------------------------------------------------------------------------|---------------------------------------------------------------------------------------------------------------------------------------------------------------------------------------|
| The Consortium of Investigators of Modifiers of BRCA1/2 (CIMBA) (51)                                          | 7183 BRCA1 mutation carriers, of which 1658 were unaffected, 2497 were breast cancer case patients, 543 were ovarian cancer case patients, and 267 had both breast and ovarian cancer |
| Breast Cancer Association Consortium (BCAC) (52)                                                              | 5101 BRCA2 mutation carriers, of which 2183 were unaffected, 2538 were breast cancer case patients, 240 were ovarian cancer case patients, and 140 had both breast and ovarian cancer |
| Ovarian Cancer Association Consortium (OCAC) (53)                                                             | 41 081 breast cancer case patients and 38 693 female control patients                                                                                                                 |
| PRostate cancer AssoCiation group To Investigate Cancer Associated aLterations in the genome (PRACTICAL) (54) | 14 542 invasive ovarian cancer case patients and 23 111 female control patients                                                                                                       |
|                                                                                                               | 21 014 prostate cancer case patients and 21 992 male control patients                                                                                                                 |

**Table 2.** Frequencies of the two most frequent BRCA2 pathogenic variants that co-occurred with the K3326X common variant in the Consortium of Investigators of Modifiers of BRCA1/2

| Human Genome Variation Society nomenclature | BRCA2 K3326X noncarriers | BRCA2 K3326X carriers | P         |
|---------------------------------------------|--------------------------|-----------------------|-----------|
| c.6275_6276delTT                            | 5                        | 233                   | <.001*    |
| c.4889C>G                                   | 0                        | 9                     | <.001*    |
| Other BRCA2 known pathogenic variants†      | 4790                     | 64                    | Reference |

\* P values using two-sided Fisher's exact test calculated to assess the association between the K3326X variant and known BRCA2 pathogenic variants. Each family in the Consortium of Investigators of Modifiers of BRCA1/2 was counted only once in this analysis.

† Listed in [Supplementary Table 1](#) (available online).

variant. Details of the calculation of these weights are shown in the [Supplementary Methods](#) (Available online). Using a similar approach, we evaluated the association of the K3326X variant with breast cancer risk stratified by ER status, triple-negative status (ER-, PR-, and HER2-negative), and tumor morphology, specifically ductal and lobular. We also evaluated the association of the K3326X variant with ovarian cancer risk stratified by histological subtypes of ovarian cancer, specifically serous, mucinous, endometrioid, and clear cell. We used Z-statistics to determine whether or not the magnitude of the associations between the K3326X variant and breast cancer risk were statistically different across breast and ovarian cancer subtypes. Using the datasets from the CIMBA consortium and Cox proportional hazards model, we examined the associations of the K3326X variant with breast and ovarian cancer risks for BRCA1 pathogenic variant carriers with censoring as defined in other CIMBA consortium analyses of data from the iCOGS study (21). To account for the inclusion of multiple carriers from the same family, a robust variance approach clustering on family membership was used (22). We tested the proportional-hazards assumption on the basis of Schoenfeld residuals. Statistical analyses were performed in R (version 2.14.2) (23). All statistical tests were two sided, with cutoff for statistical significance being .05.

### Homology-Directed Repair Assay

The HDR assay for BRCA2 has been described previously by Guidugli et al. (24). Full-length flag-BRCA2 wild-type and mutant expression constructs were cotransfected with an I-Sce1 expressing pcBASce plasmid into BRCA2 deficient V-C8 cells, stably expressing the DR-GFP reporter plasmid. HDR-dependent DNA double strand break was quantified by fluorescence-activated cell sorting (FACS) of GFP-positive cells after 72 hours. Equivalent expression of wild-type and mutant BRCA2 proteins was confirmed by western blot analysis of anti-Flag-M2 (Sigma F1804) antibody immunoprecipitates from V-C8 cell lysates.

### Results

In summary, 7183 BRCA1 mutation carriers and 5101 BRCA2 mutation carriers from CIMBA were used in the weight calculation; 76 637 cancer case patients and 83 796 control patients from BCAC, OCAC, and PRACTICAL were used in the main analysis. [Table 2](#) shows the frequencies of the two most frequent BRCA2 pathogenic variants (c.6275\_6276delTT and c.4889C>G) among K3326X variant carriers in CIMBA. The c.6275\_6276delTT known pathogenic variant was identified in 233 of 306 K3326X variant carrier families carrying the K3326X variant and in 5/4795 K3326X variant noncarrier families ( $P < .001$ ), and c.4889C>G was observed in nine



of 306 K3326X variant-positive families and zero of 4795 K3326X variant noncarrier families ( $P < .001$ ). The list and frequency of all pathogenic variants in the BRCA2 gene that co-occurred with the K3326X variant in CIMBA are shown in [Supplementary Table 1](#) (available online). Within the BCAC dataset, among K3326X variant carriers, 1471 of 1490 individuals also harbored the BRCA2\*c.9257-16T>C variant, which was not considered pathogenic based on the low likelihood for splice site alteration (13). Within the OCAC dataset, among K3326X variant carriers, all K3326X variant carriers also carried the BRCA2\*c.9257-16T>C variant. Within the independently sequenced set of ovarian cancer case patients and control patients, 2240 ovarian cancer case patients and 1530 control patients were included. Twenty-seven K3326X carriers were found in the control patients, compared with 48 in the case patients (OR = 1.23, 95% CI = 0.70 to 2.00,  $P = .45$ ), and three of these carriers (all case patients) also carried the BRCA2\*c.6275\_6276delTT pathogenic variant.

### Association Between the K3326X Variant and Breast Cancer Risk

Previous principal component analyses of these data derived six components used as adjustments for population structure in logistic regression models (17). The analyses of K3326X and breast cancer are shown in [Table 3](#). The K3326X variant was associated with all invasive breast cancer (OR<sub>w</sub> = 1.28, 95% CI = 1.17 to 1.40,  $P = 5.9 \times 10^{-6}$ ), and this association was stronger for triple-negative breast cancer (OR<sub>w</sub> = 1.52, 95% CI = 1.18 to 1.92,  $P = 4.77 \times 10^{-3}$ ) and estrogen receptor-negative breast cancer (OR<sub>w</sub> = 1.50, 95% CI = 1.28 to 1.76,  $P = 4.10 \times 10^{-5}$ ). Of note, the odds ratios adjusted for potential LD with known pathogenic BRCA2 variants were only slightly attenuated (eg, from 1.31 to 1.28 for all invasive breast cancer). However, the weighted odds ratios were not statistically different between ER+ breast cancer data subsets and either ER- ( $P = .06$ ) or triple-negative breast cancer data subsets ( $P = .20$ ), which might be because of the small sample size of ER- ( $n = 158$ ) and triple-negative breast cancer case patients ( $n = 53$ ). There was no evidence that K3326X was associated with lobular breast cancer ( $P = .70$ ), but the sample size of lobular breast cancer case patients among the K3326X variant carriers was relatively small ( $n = 67$ ), and the association between K3326X and breast cancer was not statistically different between participants with ductal and lobular tumors ( $P = .17$ ). No association with breast cancer risk for BRCA1 pathogenic

variant carriers was observed (HR = 1.00, 95% CI = 0.78 to 1.29,  $P = 1.00$ ) (data not shown).

### Association Between the K3326X Variant and Ovarian Cancer Risk

Previous principal component analyses derived five components used as adjustments for population structure in logistic regression models (25). Adjusted weighted and unweighted odds ratios by histologic subtype of ovarian cancer are presented in [Table 4](#). The K3326X variant was present in 323 of 14 542 individuals (2.2%) with invasive ovarian cancer (OR = 1.29, 95% CI = 1.13 to 1.46,  $P = 1.41 \times 10^{-3}$ ; OR<sub>w</sub> = 1.26, 95% CI = 1.10 to 1.43,  $P = 3.84 \times 10^{-3}$ ) compared with 1.8% of control patients. A statistically significant association of K3326X was observed with serous ovarian cancer (OR<sub>w</sub> = 1.46, 95% CI = 1.26 to 1.70,  $P = 3.44 \times 10^{-5}$ ). However, little evidence was seen for an association of K3326X with nonserous ovarian cancer, although the sample size of such cancer case patients among the K3326X variant carriers was small ( $n = 60$ ). The weighted odds ratios were statistically different between serous ovarian cancer data subsets and nonserous ovarian cancer data subsets ( $P = 9.0 \times 10^{-4}$ ). In contrast, among BRCA1 carriers, a statistically significantly decreased risk for K3326X variant carriers vs noncarriers was observed (HR = 0.43, 95% CI = 0.22 to 0.84,  $P = .013$ ) (data not shown).

### Association Between the K3326X Variant and Prostate Cancer Risk

Previous principal component analyses derived six components used as adjustments for population structure in logistic regression models (26). The K3326X variant was present in 358 of 21 014 case patients (1.7%) compared with 364 of 21 992 control patients (1.7%) (OR = 0.92, 95% CI = 0.77 to 1.09,  $P = .39$ ; OR<sub>w</sub> = 0.90, 95% CI = 0.76 to 1.07,  $P = .32$ ). We estimated that this study had 87.6% power to detect an odds ratio of 1.25 using a two-sided test, assuming that 1.7% of the population are K3326X carriers (data not shown).

## Discussion

In this study, we confirmed that the BRCA2 K3326X variant is associated with increased risk of breast cancer independent of additional BRCA2 pathogenic variants and demonstrated an even stronger association with serous ovarian cancer. These

**Table 3.** Association between BRCA2 K3326X variant and risk of breast cancer (BC) by tumor subtypes: Breast Cancer Association Consortium

| Subtypes          | No. of BC cases | Number of K3326X carriers in BC cases | OR (95% CI)*        | P for OR              | Weighted OR <sub>w</sub> (95% CI)*,† | P for OR <sub>w</sub> ‡ |
|-------------------|-----------------|---------------------------------------|---------------------|-----------------------|--------------------------------------|-------------------------|
| Control women     | 38 693          | 637                                   | 1.00 (Ref)          |                       | 1.00 (Ref)                           |                         |
| Invasive BC cases | 41 081          | 852                                   | 1.31 (1.20 to 1.43) | $6.05 \times 10^{-7}$ | 1.28 (1.17 to 1.40)                  | $5.86 \times 10^{-6}$   |
| ER-               | 6441            | 158                                   | 1.54 (1.31 to 1.79) | $5.07 \times 10^{-6}$ | 1.50 (1.28 to 1.76)                  | $4.10 \times 10^{-5}$   |
| ER+               | 24 833          | 501                                   | 1.28 (1.15 to 1.42) | $8.50 \times 10^{-5}$ | 1.25 (1.13 to 1.39)                  | $2.29 \times 10^{-4}$   |
| Triple-negative   | 2158            | 53                                    | 1.55 (1.22 to 1.96) | $2.45 \times 10^{-3}$ | 1.52 (1.18 to 1.92)                  | $4.77 \times 10^{-3}$   |
| Ductal            | 21 490          | 466                                   | 1.33 (1.20 to 1.48) | $3.38 \times 10^{-6}$ | 1.30 (1.18 to 1.44)                  | $2.17 \times 10^{-5}$   |
| Lobular           | 3752            | 67                                    | 1.07 (0.87 to 1.32) | .57                   | 1.05 (0.85 to 1.29)                  | .70                     |

\* Adjusted for attained age (at interview for control patients and at diagnosis for case patients), principal components of European population structure, and study site. CI = confidence interval; ER = estrogen receptor; OR = odds ratio.

† Calculated using weighted logistic regression models. The weight applied for the  $i^{\text{th}}$  individual in the Breast Cancer Association Consortium dataset is  $(1 - \text{Probability of K3326X carriage and harboring known pathogenic variants in BRCA2})$ .

‡  $P$  values calculated using a two-sided Wald test.

**Table 4.** Association between BRCA2 K3326X variant and risk of ovarian cancer (OC) by histological subtype: Ovarian Cancer Association Consortium

| Subtype           | No. of OC cases* | No. of K3326X carriers in BC cases | OR (95% CI)†        | P for OR              | Weighted OR <sub>w</sub> (95% CI)‡,§ | P for OR <sub>w</sub> § |
|-------------------|------------------|------------------------------------|---------------------|-----------------------|--------------------------------------|-------------------------|
| Control women     | 23 111           | 411                                | 1.00 (Ref)          |                       | 1.00 (Ref)                           |                         |
| Invasive OC cases | 14 514           | 322                                | 1.29 (1.13 to 1.46) | 1.41x10 <sup>-3</sup> | 1.26 (1.10 to 1.43)                  | 3.84x10 <sup>-3</sup>   |
| Serous            | 8360             | 210                                | 1.50 (1.29 to 1.74) | 9.21x10 <sup>-6</sup> | 1.46 (1.26 to 1.70)                  | 3.44x10 <sup>-5</sup>   |
| Nonserous         | 4031             | 60                                 | 0.83 (0.65 to 1.04) | .18                   | 0.81 (0.63 to 1.02)                  | .14                     |
| Mucinous          | 943              | 16                                 | 0.93 (0.59 to 1.39) | .79                   | 0.91 (0.58 to 1.37)                  | .72                     |
| Endometrioid      | 2066             | 31                                 | 0.82 (0.59 to 1.11) | .31                   | 0.81 (0.58 to 1.10)                  | .27                     |
| Clear cell        | 1022             | 13                                 | 0.72 (0.44 to 1.12) | .26                   | 0.71 (0.42 to 1.10)                  | .23                     |

\* In total, 2129 case patients did not have information on ovarian cancer histologic type. CI = confidence interval; OR = odds ratio; Ref = reference.

† Adjusted for attained age (at interview for control patients and at diagnosis for case patients), principal component of European population structure, and study site.

‡ Calculated using weighted logistic regression models. The weight applied for the k<sup>th</sup> individual in the Ovarian Cancer Association Consortium dataset is (1 - Probability of K3326X carriage and harboring known pathogenic variants in BRCA2).

§ P values calculated using a two-sided Wald test.

results suggest a role for the K3326X variant in both breast and ovarian cancers etiology but not in prostate cancer etiology.

The prevalence of K3326X in control populations (1.7%) is consistent with the observed allele frequency of the K3326X variant in the European population reported by the International HapMap Consortium (27). More recent data (Exome Aggregation Consortium [ExAC], Cambridge, MA, <http://exac.broadinstitute.org>) found the variant in 609 of 33 749 (1.8%) non-Finnish European sequenced individuals and a carrier frequency of 2.4% in Finland. In our study, most K3326X carriers also carried the BRCA2\*c9257-16T>C variant, which is also consistent with previous studies (13,28). However, most individuals with BRCA2 pathogenic variants do not carry the K3326X variant, with the exception of individuals with c.6275\_6276delTT and c.4889C>G variants (Table 2).

The odds ratios obtained from unweighted logistic regression and weighted logistic regression were similar, suggesting that K3326X is associated with the risk of developing breast and ovarian cancers independently from BRCA2 known pathogenic variants (Tables 3 and 4). The association of the K3326X variant with cancer risk was strongest in patients with triple-negative breast and serous ovarian tumors (OR<sub>w</sub> = 1.52, 95% CI = 1.18 to 1.92; and OR<sub>w</sub> = 1.46, 95% CI = 1.26 to 1.70, respectively). ER-negative and triple-negative status has been linked to BRCA1 variants but not BRCA2 variants (29–35). Because of these findings, BRCA1 tumors were hypothesized to have a different hormone-independent mechanism than BRCA2 tumors (33). More research should explore the potential role of the BRCA2 K3326X variant in the etiology of these disease phenotypes. Interestingly, the finding for serous ovarian cancer is consistent with epidemiological and genetic data showing that serous tumors have a different etiology from other ovarian carcinomas (36–38). Notably, it is BRCA1 pathogenic variant carriers that generally have a higher risk of ER- breast and serous ovarian tumors, while there is no clear differential association for BRCA2 pathogenic variant carriers (33). Overall, our results, together with evidence of molecular commonalities between triple-negative breast and high-grade serous ovarian tumors (39), suggest a possible related etiology between these two tumor subtypes.

Our study also provides other interesting findings that warrant further investigation. First, the K3326X variant is associated with increased risks of breast and ovarian cancer in the general population; however, in BRCA1 variant carriers the K3326X variant is inversely associated with risk of ovarian cancer and not with risk of breast cancer. Second, our study found no association between the K3326X variant and prostate cancer risk, in

contrast to the increased risk of prostate cancer in carriers of BRCA2 pathogenic variants (44–47). The difference between the risk associations of K3326X and known BRCA2 pathogenic variants has been observed previously. Wang et al. (16) reported a more than two-fold increased squamous-cell lung carcinoma risk in K3326X variant carriers; however, to date, there has been no evidence of any altered risk of lung cancer in families carrying BRCA2 pathogenic variants (8,40,41). Additional studies are required to analyze the discrepant risk associations of the K3326X variant and other known BRCA2 pathogenic variants with prostate and lung cancer risks and whether the K3326X variant may have an association with cancer risk independent of other genes. In contrast to lung cancer, there have been some reports of carriers of BRCA2 pathogenic variants having increased risk of some UADT cancers (40,41).

We can only speculate about how K3326X might affect key functions of the BRCA2 protein. Fanconi anemia is an autosomal recessive disease characterized by cancer susceptibility, cellular hypersensitivity to DNA cross-linking agents, and other conditions (42). FANCD2 encodes the protein for Fanconi anemia group D2 and is monoubiquitinated in response to DNA damage (43). Interaction of monoubiquitinated FANCD2 and BRCA2 is essential for activation of the homologous recombination activity of RAD51, an important enzyme involved in DNA repair mechanisms, and for loading onto the damaged DNA (44–49). Cells that express BRCA2 protein lacking the C terminal exon 27 coding region do not show colocalization of FANCD2, BRCA2, and RAD51 on chromatin (44,49); mice with deletions of exon 27 and FANCD2 knockout mice had increased susceptibility to various types of cancers (50). We hypothesize that the K3326X variant modifies breast and ovarian cancer risk by altering the C terminus of BRCA2, resulting in loss of the interaction between FANCD2 and BRCA2 and, thus, inactivating RAD51. Our preliminary functional analyses showed that the average scaled HDR fold change for K3326X is 2.92 on a scale of 1 to 5, with a value of 5 for wild-type and 1 for BRCA2 pathogenic variant D2723H. Although this value is significantly higher than known BRCA2 pathogenic mutations, it does fall slightly outside the range of neutral variants that have been observed to date (24). It is possible that this reduced efficiency of HDR capacity is sufficient to cause the small increased breast and ovarian cancers risks described in this study. Additional experiments are still being performed to demonstrate the role of the K3326X variant on the BRCA2 protein.

Our study is the largest study to date examining the association of the BRCA2 K3326X variant and breast, ovarian, and



prostate cancer risks. The large sample size and the use of weighted logistic regression models allowed us to estimate the underlying association of K3326X with cancer risk independent of known BRCA2 pathogenic variants that are in LD with K3326X. A limitation of our analysis was the lack of BRCA2 status in the BCAC and OCAC datasets, resulting in our use of the CIMBA BRCA2 dataset to calculate the probability of BRCA2 in order to create weights for the logistic regression models. As shown in Tables 3 and 4, the effect of LD between K3326X and two BRCA2 pathogenic variants (ie, c.6275\_6276delTT and c.4889C>G) was quite small and did not materially change the results. Therefore, it is extremely unlikely that the association with breast cancer can be explained by LD with BRCA2 pathogenic variants as hypothesized by Higgs et al. (19); we note that their conclusion is based on theoretical calculations and did not include a matched control dataset corresponding to the highly familial cases sequenced in the study.

In conclusion, our study provides evidence that the BRCA2\*c.9976A>T (K3326X) variant contributes to the risk of developing breast and ovarian cancers. It remains open whether the underlying mechanism for this association is identical to that for lung and UADT cancers; it is unlikely that this question can be resolved using genetic data alone. Additional functional studies will be needed to determine the biological mechanism of action of the K3326X variant in the diverse set of cancers associated with it.

## Funding

This work was supported by the Government of Canada through Genome Canada and the Canadian Institutes of Health Research and the Ministère de l'Économie, de l'Innovation et des Exportations du Québec through Génome Québec.

Amanda Spurdle is supported by a National Health and Medical Research Council (NHMRC) Senior Research Fellowship, and aspects of this research were funded by Australian NHMRC Project grant ID #1010719. This work was also supported in part by National Institutes of Health (NIH) grants CA128978 and CA116167, an NIH specialized program of research excellence in breast cancer to the Mayo Clinic (P50 CA116201), and the Breast Cancer Research Foundation. The Consortium of Investigators of Modifiers of BRCA1/2 (CIMBA) data management and analysis is funded through Cancer Research-UK grant C12292/A11174. Breast Cancer Association Consortium (BCAC) data management was funded by Cancer Research UK (C1287/A10118 and C1287/A12014) and by the European Community's Seventh Framework Programme under grant agreement 223175 (HEALTH-F2-2009-223175). BCAC meetings have been funded by the European Union COST programme (BM0606). Ovarian Cancer Association Consortium (OCAC) is supported by a grant from the Ovarian Cancer Research Fund thanks to donations by the family and friends of Kathryn Sladek Smith (PPD/RPCI.07). The scientific development and funding for this project were in part supported by the US National Cancer Institute Genetic Associations and Mechanisms in Oncology (GAME-ON) Post-Genome Wide Association Study (GWAS) Initiative (U19-CA148112). This study made use of data generated by the Wellcome Trust Case Control consortium. A full list of the investigators who contributed to the generation of the data is available at <http://www.wtccc.org.uk/>. Funding for the project was provided by the Wellcome Trust under award 076113. The results published here are in part based upon data generated by the Cancer Genome Atlas Pilot Project established by the National Cancer Institute and National Human Genome Research Institute.

Funding for the iCOGS infrastructure came from: the European Community's Seventh Framework Programme under grant agreement n° 223175 (HEALTH-F2-2009-223175) (COGS), Cancer Research UK (C1287/A10118, C1287/A 10710, C12292/A11174, C1281/A12014, C5047/A8384, C5047/A15007, C5047/A10692, C8197/A16565), the National Institutes of Health (CA128978) and Post-Cancer GWAS initiative (1U19 CA148537, 1U19 CA148065 and 1U19 CA148112 - the GAME-ON initiative), the Department of Defence (W81XWH-10-1-0341), the Canadian Institutes of Health Research (CIHR) for the CIHR Team in Familial Risks of Breast Cancer, Komen Foundation for the Cure, the Breast Cancer Research Foundation, and the Ovarian Cancer Research Fund.

## Notes

This study would not have been possible without the contributions of the following: Per Hall (COGS); Douglas F. Easton, Paul Pharoah, Kyriaki Michailidou, Manjeet K. Bolla, Qin Wang (BCAC); Andrew Berchuck (OCAC); Rosalind A. Eeles, Douglas F. Easton, Ali Amin Al Olama, Zsofia Kote-Jarai, and Sara Benlloch (PRostate cancer AssOCIation group To Investigate Cancer Associated aLterations in the genome); Georgia Chenevix-Trench, Antonis Antoniou, Lesley McGuffog, Fergus Couch, and Ken Offit (CIMBA); Joe Dennis, Alison M. Dunning, Andrew Lee, and Ed Dicks; Craig Luccarini and the staff of the Centre for Genetic Epidemiology Laboratory; Javier Benitez, Anna Gonzalez-Neira, and the staff of the CNIO genotyping unit; Jacques Simard and Daniel C. Tessier; Francois Bacot, Daniel Vincent, Sylvie LaBoissière, Frederic Robidoux, and the staff of the McGill University and the Génome Québec Innovation Centre; Stig E. Bojesen, Sune F. Nielsen, Borge G. Nordestgaard, and the staff of the Copenhagen DNA laboratory; and Julie M. Cunningham, Sharon A. Windebank, Christopher A. Hilker, Jeffrey Meyer, and the staff of Mayo Clinic Genotyping Core Facility.

## References

1. Brohet RM, Velthuisen ME, Hogervorst FB, et al. Breast and ovarian cancer risks in a large series of clinically ascertained families with a high proportion of BRCA1 and BRCA2 Dutch founder mutations. *J Med Genet.* 2014;51(2):98-107.
2. Tavtigian SV, Simard J, Rommens J, et al. The complete BRCA2 gene and mutations in chromosome 13q-linked kindreds. *Nat Genet.* 1996;12(3):333-337.
3. Wooster R, Bignell G, Lancaster J, et al. Identification of the breast cancer susceptibility gene BRCA2. *Nature.* 1995;378(6559):789-792.
4. Wooster R, Neuhausen SL, Mangion J, et al. Localization of a breast cancer susceptibility gene, BRCA2, to chromosome 13q12-13. *Science.* 1994;265(5181):2088-2090.
5. Antoniou A, Pharoah PD, Narod S, et al. Average risks of breast and ovarian cancer associated with BRCA1 or BRCA2 mutations detected in case Series unselected for family history: a combined analysis of 22 studies. *Am J Hum Genet.* 2003;72(5):1117-1130.
6. Ford D, Easton DF, Stratton M, et al. Genetic heterogeneity and penetrance analysis of the BRCA1 and BRCA2 genes in breast cancer families. The Breast Cancer Linkage Consortium. *Am J Hum Genet.* 1998;62(3):676-689.
7. Moran A, O'Hara C, Khan S, et al. Risk of cancer other than breast or ovarian in individuals with BRCA1 and BRCA2 mutations. *Fam Cancer.* 2012;11(2):235-242.
8. Risch HA, McLaughlin JR, Cole DE, et al. Population BRCA1 and BRCA2 mutation frequencies and cancer penetrances: a kin-cohort study in Ontario, Canada. *J Natl Cancer Inst.* 2006;98(23):1694-1706.
9. Thompson D, Szabo CI, Mangion J, et al. Evaluation of linkage of breast cancer to the putative BRCA3 locus on chromosome 13q21 in 128 multiple case families from the Breast Cancer Linkage Consortium. *Proc Natl Acad Sci U S A.* 2002;99(2):827-831.
10. Iqbal J, Ragone A, Lubinski J, et al. The incidence of pancreatic cancer in BRCA1 and BRCA2 mutation carriers. *Br J Cancer.* 2012;107(12):2005-2009.
11. Mocchi E, Milne RL, Mendez-Villamil EY, et al. Risk of pancreatic cancer in breast cancer families from the breast cancer family registry. *Cancer Epidemiol Biomarkers Prev.* 2013;22(5):803-811.

12. Mazoyer S, Dunning AM, Serova O, et al. A polymorphic stop codon in BRCA2. *Nat Genet.* 1996;14(3):253–254.
13. Claes K, Poppe B, Machackova E, et al. Differentiating pathogenic mutations from polymorphic alterations in the splice sites of BRCA1 and BRCA2. *Genes Chromosomes Cancer.* 2003;37(3):314–320.
14. Haraldsson K, Loman N, Zhang QX, et al. BRCA2 germ-line mutations are frequent in male breast cancer patients without a family history of the disease. *Cancer Res.* 1998;58(7):1367–1371.
15. Krainer M, Silva-Arrieta S, FitzGerald MG, et al. Differential contributions of BRCA1 and BRCA2 to early-onset breast cancer. *N Engl J Med.* 1997;336(20):1416–1421.
16. Wang Y, McKay JD, Rafnar T, et al. Rare variants of large effect in BRCA2 and CHEK2 affect risk of lung cancer. *Nat Genet.* 2014;46(7):736–741.
17. Michailidou K, Hall P, Gonzalez-Neira A, et al. Large-scale genotyping identifies 41 new loci associated with breast cancer risk. *Nat Genet.* 2013;45(4):353–361, 361e1–361e2.
18. Delahaye-Sourdeix M, Anantharaman D, Timofeeva MN, et al. A rare truncating BRCA2 variant and genetic susceptibility to squamous cell cancers of upper aerodigestive tract. *J Natl Cancer Inst Monogr.* 2014.
19. Higgs JE, Harkness EF, Bowers NL, et al. The BRCA2 polymorphic stop codon: stuff or nonsense? *J Med Genet.* 2015;52(9):642–645.
20. Sakoda LC, Jorgenson E, Witte JS. Turning of COGS moves forward findings for hormonally mediated cancers. *Nat Genet.* 2013;45(4):345–348.
21. Gaudet MM, Kuchenbaecker KB, Vijai J, et al. Identification of a BRCA2-specific modifier locus at 6p24 related to breast cancer risk. *PLoS Genet.* 2013;9(3):e1003173.
22. Williams RL. A note on robust variance estimation for cluster-correlated data. *Biometrics.* 2000;56(2):645–646.
23. R Development Core Team. R: A language and environment for statistical computing. In: Vienna, Austria: R Foundation for Statistical Computing; 2010.
24. Guidugli L, Pankratz VS, Singh N, et al. A classification model for BRCA2 DNA binding domain missense variants based on homology-directed repair activity. *Cancer Res.* 2013;73(1):265–275.
25. Pharoah PD, Tsai YY, Ramus SJ, et al. GWAS meta-analysis and replication identifies three new susceptibility loci for ovarian cancer. *Nat Genet.* 2013;45(4):362–370, 370e1–370e2.
26. Eeles RA, Olama AA, Benlloch S, et al. Identification of 23 new prostate cancer susceptibility loci using the iCOGS custom genotyping array. *Nat Genet.* 2013;45(4):385–391, 391e1–391e2.
27. International HapMap C. A haplotype map of the human genome. *Nature.* 2005;437(7063):1299–1320.
28. Martin ST, Matsubayashi H, Rogers CD, et al. Increased prevalence of the BRCA2 polymorphic stop codon K3326X among individuals with familial pancreatic cancer. *Oncogene.* 2005;24(22):3652–3656.
29. Atchley DP, Albarracin CT, Lopez A, et al. Clinical and pathologic characteristics of patients with BRCA-positive and BRCA-negative breast cancer. *J Clin Oncol.* 2008;26(26):4282–4288.
30. Eisinger F, Stoppa-Lyonnet D, Longy M, et al. Germ line mutation at BRCA1 affects the histoprognoic grade in hereditary breast cancer. *Cancer Res.* 1996;56(3):471–474.
31. Foulkes WD, Stefansson IM, Chappuis PO, et al. Germline BRCA1 mutations and a basal epithelial phenotype in breast cancer. *J Natl Cancer Inst.* 2003;95(19):1482–1485.
32. Karp SE, Tonin PN, Begin LR, et al. Influence of BRCA1 mutations on nuclear grade and estrogen receptor status of breast carcinoma in Ashkenazi Jewish women. *Cancer.* 1997;80(3):435–441.
33. Lakhani SR, Van De Vijver MJ, Jacquemier J, et al. The pathology of familial breast cancer: predictive value of immunohistochemical markers estrogen receptor, progesterone receptor, HER-2, and p53 in patients with mutations in BRCA1 and BRCA2. *J Clin Oncol.* 2002;20(9):2310–2318.
34. Quenneville LA, Phillips KA, Ozcelik H, et al. HER-2/neu status and tumor morphology of invasive breast carcinomas in Ashkenazi women with known BRCA1 mutation status in the Ontario Familial Breast Cancer Registry. *Cancer.* 2002;95(10):2068–2075.
35. Robson M, Gilewski T, Haas B, et al. BRCA-associated breast cancer in young women. *J Clin Oncol.* 1998;16(5):1642–1649.
36. Shih Ie M, Kurman RJ. Ovarian tumorigenesis: a proposed model based on morphological and molecular genetic analysis. *Am J Pathol.* 2004;164(5):1511–1518.
37. Risch HA, Marrett LD, Jain M, et al. Differences in risk factors for epithelial ovarian cancer by histologic type. Results of a case-control study. *Am J Epidemiol.* 1996;144(4):363–372.
38. Landen CN Jr, Birrer MJ, Sood AK. Early events in the pathogenesis of epithelial ovarian cancer. *J Clin Oncol.* 2008;26(6):995–1005.
39. Cancer Genome Atlas N. Comprehensive molecular portraits of human breast tumours. *Nature.* 2012;490(7418):61–70.
40. van Asperen CJ, Brohet RM, Meijers-Heijboer EJ, et al. Cancer risks in BRCA2 families: estimates for sites other than breast and ovary. *J Med Genet.* 2005;42(9):711–719.
41. Consortium BCL. Cancer risks in BRCA2 mutation carriers. *J Natl Cancer Inst.* 1999;91(15):1310–1316.
42. Joenje H, Patel KJ. The emerging genetic and molecular basis of Fanconi anaemia. *Nat Rev Genet.* 2001;2(6):446–457.
43. Taniguchi T, D'Andrea AD. Molecular pathogenesis of Fanconi anemia: recent progress. *Blood.* 2006;107(11):4223–33.
44. Atanassov BS, Barrett JC, Davis BJ. Homozygous germ line mutation in exon 27 of murine Brca2 disrupts the Fancd2-Brca2 pathway in the homologous recombination-mediated DNA interstrand cross-links' repair but does not affect meiosis. *Genes Chromosomes Cancer.* 2005;44(4):429–437.
45. Mizuta R, LaSalle JM, Cheng HL, et al. RAB22 and RAB163/mouse BRCA2: proteins that specifically interact with the RAD51 protein. *Proc Natl Acad Sci U S A.* 1997;94(13):6927–6932.
46. Pellegrini L, Venkittaraman A. Emerging functions of BRCA2 in DNA recombination. *Trends Biochem Sci.* 2004;29(6):310–316.
47. Pellegrini L, Yu DS, Lo T, et al. Insights into DNA recombination from the structure of a RAD51-BRCA2 complex. *Nature.* 2002;420(6913):287–293.
48. Shivji MK, Davies OR, Savill JM, et al. A region of human BRCA2 containing multiple BRC repeats promotes RAD51-mediated strand exchange. *Nucleic Acids Res.* 2006;34(14):4000–4011.
49. Wang X, Andreassen PR, D'Andrea AD. Functional interaction of monoubiquitinated FANCD2 and BRCA2/FANCD1 in chromatin. *Mol Cell Biol.* 2004;24(13):5850–5862.
50. McAllister KA, Bennett LM, Houle CD, et al. Cancer susceptibility of mice with a homozygous deletion in the COOH-terminal domain of the Brca2 gene. *Cancer Res.* 2002;62(4):990–994.
51. Antoniou AC, Sinilnikova OM, Simard J, et al. RAD51 135G-->C modifies breast cancer risk among BRCA2 mutation carriers: results from a combined analysis of 19 studies. *Am J Hum Genet.* 2007;81(6):1186–1200.
52. Breast Cancer Association C. Commonly studied single-nucleotide polymorphisms and breast cancer: results from the Breast Cancer Association Consortium. *J Natl Cancer Inst.* 2006;98(19):1382–1396.
53. Schildkraut JM, Goode EL, Clyde MA, et al. Single nucleotide polymorphisms in the TP53 region and susceptibility to invasive epithelial ovarian cancer. *Cancer Res.* 2009;69(6):2349–2357.
54. Kote-Jarai Z, Easton DF, Stanford JL, et al. Multiple novel prostate cancer predisposition loci confirmed by an international study: the PRACTICAL Consortium. *Cancer Epidemiol Biomarkers Prev.* 2008;17(8):2052–2061.
